# Supplementary material
Source: Springer Nature journal article supplement (https://www.springermedizin.de/resource/supplementary/12887_2007_175_MOESM1_ESM.pdf/9477428)

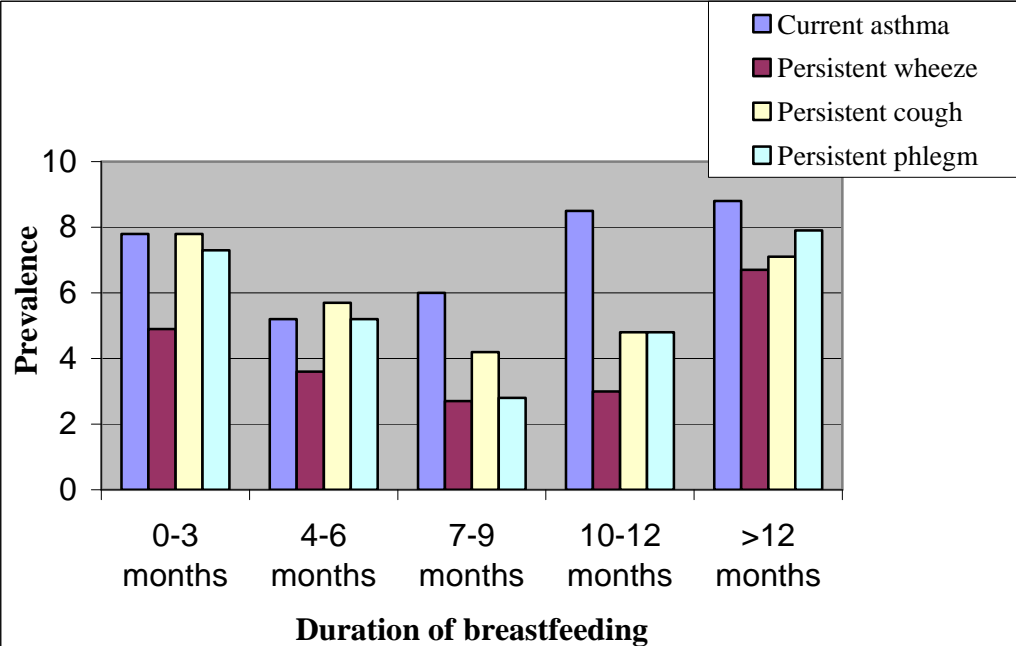

Supplement: MOESM1 [file 9477428]
